# Supplementary material for: Oleanolic Acid Alleviates Atopic Dermatitis-like Responses In Vivo and In Vitro
Source: MDPI journal article supplement (doi:10.3390/ijms222112000), 2021-11-05
Supplement: s1 [file s1]

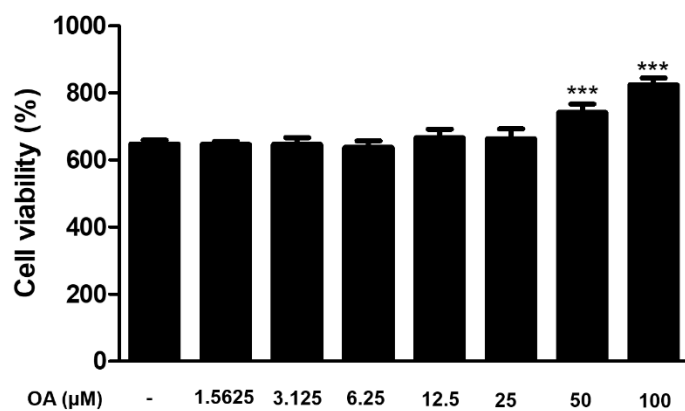

Supplementary Figure S1. Effect of OA on cell viability in HaCaT cells. Cells were seeded in a 96-well culture plate at  $5 \times 10^4$  cells/ml in culture medium and allowed to attach for 24 h. Cells were treated with medium containing various concentrations of OA. After incubating for 24 h, the cells were treated with 50  $\mu$ l of MTT (5  $\mu$ g/ml) for 4 h. The formazan precipitated was dissolved in DMSO, and absorbance was measured at 540 nm using a microplate reader.
